# Supplementary material for: Joint subarray acoustic tweezers enable controllable cell translation, rotation, and deformation
Source: PubMed Central journal article supplement — Nat Commun. 2024 Oct 20;15:9059. doi: 10.1038/s41467-024-52686-8 (PMC11491459; doi:10.1038/s41467-024-52686-8), 2024-10-20
Supplement: 41467_2024_52686_MOESM3_ESM.pdf [file 41467_2024_52686_MOESM3_ESM.pdf]

## Description of Additional Supplementary Files

**Supplementary Movie 1.** An MCF7 cell's movement guided by our JDAT device to automatically depict the letters 'D', 'U', 'K', and 'E'.

**Supplementary Movie 2.** An MCF cell moving in the  $+z$ -direction, when gradually increasing the applied voltage from 0 V<sub>pp</sub> to 10 V<sub>pp</sub>.

**Supplementary Movie 3.** 200 nm fluorescent polystyrene spheres driving by acoustic streaming vortices induced by  $y$ -axis standing SAWs; an MCF7 cell rotating in the  $+\theta_x$ -direction; and an MCF7 cell rotating in the  $-\theta_x$ -direction.

**Supplementary Movie 4.** 200 nm fluorescent polystyrene spheres driving by acoustic streaming vortices induced by  $x$ -axis standing SAWs; an MCF7 cell rotating in the  $+\theta_y$ -direction; and an MCF7 cell rotating in the  $-\theta_y$ -direction.

**Supplementary Movie 5.** 200 nm fluorescent polystyrene spheres driving by an acoustic streaming vortex induced by traveling SAWs; an MCF7 cell rotating in the  $+\theta_z$ -direction; and an MCF7 cell rotating in the  $-\theta_z$ -direction.

**Supplementary Movie 6.** An MCF7 cell rotating with respect to an axis in the in-plane  $-45^\circ$ ; an MCF7 cell rotating with respect to an axis in the in-plane  $-29^\circ$ ; and an MCF7 cell rotating with respect to an axis in the in-plane  $-15^\circ$ .

**Supplementary Movie 7.** An MCF7 cell simultaneously translating in the  $+x$ -direction and rotating in the  $+\theta_x$ -direction; and an MCF7 cell simultaneously translating in the  $+y$ -direction and rotating in the  $+\theta_y$ -direction.

**Supplementary Movie 8.** An MCF7 cell simultaneously moving in the  $+x$ -direction and rotating in the  $+\theta_y$ -direction; and an MCF7 cell simultaneously moving in the  $+y$ -direction and rotating in the  $+\theta_x$ -direction.

**Supplementary Movie 9.** An MCF7 cell simultaneously moving in the  $+x$ -direction and rotating in the  $+\theta_z$ -direction; and an MCF7 cell simultaneously moving in the  $+y$ -direction and rotating in the  $+\theta_z$ -direction.

**Supplementary Movie 10.** An MCF7 cell gradually deformed by our JSAT device.

**Supplementary Movie 11.** Fluorescence of MCF7 cells in acoustic waves generated by our JSAT.
